# Supplementary material for: Syntaxins 6 and 8 facilitate tau into secretory pathways
Source: Oxford University Press journal article supplement (doi:10.1042/bcj20200664), 2021-03-26
Supplement: bcj-2020-0664_supp.pdf [file bcj-2020-0664_supp.pdf]

## Supplementary Tables

**Table S1. Yeast-two-hybrid interaction candidate hits.** List and frequency of all candidate proteins identified through yeast-two-hybrid (Y2H) with the baits tau-CTTR and PM-tau-CTTR.

| Protein  | Description                                                        | Entrez Gene ID | Y2H hits/bait |             |
|----------|--------------------------------------------------------------------|----------------|---------------|-------------|
|          |                                                                    |                | tau-CTTR      | PM-tau-CTTR |
| AHSA1    | activator of HSP90 ATPase activity 1                               | 10598          | 1             | 0           |
| ANKHD1   | ankyrin repeat and KH domain containing 1                          | 54882          | 0             | 1           |
| AP3B2    | adaptor related protein complex 3 subunit beta 2                   | 8120           | 0             | 1           |
| ASB12    | ankyrin repeat and SOCS box containing 12                          | 142689         | 0             | 1           |
| ATP1B1   | ATPase Na <sup>+</sup> /K <sup>+</sup> transporting subunit beta 1 | 481            | 1             | 2           |
| ATP1B2   | ATPase Na <sup>+</sup> /K <sup>+</sup> transporting subunit beta 2 | 482            | 0             | 2           |
| BBS7     | Bardet-Biedl syndrome 7                                            | 55212          | 0             | 1           |
| BPGM     | bisphosphoglycerate mutase                                         | 669            | 0             | 2           |
| CCDC85A  | coiled-coil domain containing 85A                                  | 114800         | 1             | 0           |
| CEP192   | centrosomal protein 192                                            | 55125          | 1             | 1           |
| CHORDC1  | cysteine and histidine rich domain containing 1                    | 26973          | 1             | 0           |
| CKAP5    | cytoskeleton associated protein 5                                  | 9793           | 3             | 1           |
| CMPK1    | cytidine/uridine monophosphate kinase 1                            | 51727          | 3             | 0           |
| CNRIP1   | cannabinoid receptor interacting protein 1                         | 25927          | 2             | 3           |
| COMMD8   | COMM domain containing 8                                           | 54951          | 0             | 1           |
| COPS5    | COP9 signalosome subunit 5                                         | 10987          | 0             | 8           |
| CUL1     | cullin 1                                                           | 8454           | 0             | 1           |
| DNAJA2   | DnaJ heat shock protein family member A2                           | 10294          | 1             | 0           |
| EFR3A    | EFR3 homolog A                                                     | 23167          | 1             | 0           |
| EIF4A1   | eukaryotic translation initiation factor 4A1                       | 1973           | 0             | 1           |
| FARSB    | phenylalanyl-tRNA synthetase subunit beta                          | 10056          | 0             | 1           |
| GFAP     | glial fibrillary acidic protein                                    | 2670           | 1             | 0           |
| GFM2     | GTP dependent ribosome recycling factor mitochondrial 2            | 84340          | 1             | 0           |
| HECTD1   | HECT domain E3 ubiquitin protein ligase 1                          | 25831          | 2             | 0           |
| HSPA5    | heat shock protein family A member 5                               | 3309           | 1             | 2           |
| IL1RAP   | interleukin 1 receptor accessory protein                           | 3556           | 1             | 0           |
| KRT222   | keratin 222                                                        | 125113         | 1             | 2           |
| MYLK     | myosin light chain kinase                                          | 4638           | 1             | 0           |
| MYT1L    | myelin transcription factor 1 like                                 | 23040          | 0             | 1           |
| N4BP2L2  | NEDD4 binding protein 2 like 2                                     | 10443          | 0             | 1           |
| NIM1K    | NIM1 serine/threonine protein kinase                               | 167359         | 1             | 0           |
| OMG      | oligodendrocyte myelin glycoprotein                                | 4974           | 1             | 0           |
| PCNA     | proliferating cell nuclear antigen                                 | 5111           | 2             | 0           |
| PDE4DIP  | phosphodiesterase 4D interacting protein                           | 9659           | 1             | 1           |
| PGM1     | phosphoglucomutase 1                                               | 5236           | 1             | 1           |
| PNISR    | PNN interacting serine and arginine rich protein                   | 25957          | 0             | 4           |
| PPP2R3C  | protein phosphatase 2 regulatory subunit B <sup>gamma</sup>        | 55012          | 0             | 1           |
| RPN2     | ribophorin II                                                      | 6185           | 1             | 0           |
| SGIP1    | SH3GL interacting endocytic adaptor 1                              | 84251          | 0             | 1           |
| SNAPIN   | SNAP associated protein                                            | 23557          | 2             | 0           |
| SPOP     | speckle type BTB/POZ protein                                       | 8405           | 0             | 3           |
| SRSF5    | serine and arginine rich splicing factor 5                         | 6430           | 1             | 0           |
| STX8     | syntaxin 8                                                         | 9482           | 0             | 2           |
| TMEM132B | transmembrane protein 132B                                         | 114795         | 1             | 0           |
| UBE2N    | ubiquitin conjugating enzyme E2 N                                  | 7334           | 2             | 0           |
| WDR48    | WD repeat domain 48                                                | 57599          | 0             | 2           |

**Table S2. STRING functional GO term annotation of CTTR interaction candidates.** GO term annotation of candidate interacting proteins of the tau-CTTR and/or PM-tau-CTTR identified through Y2H and interpreted using the STRING functional enrichment tool. Only terms after a redundancy cutoff of 0.293 were shown. FDR values were obtained through the Benjamini–Hochberg procedure. PPI Enrichment Score: 0.00139

| Category    | Term ID    | Description                                           | Count | Enriched proteins                      | FDR value |
|-------------|------------|-------------------------------------------------------|-------|----------------------------------------|-----------|
| GO Function | GO.0031625 | ubiquitin protein ligase binding                      | 5     | STX8 UBE2N HSPA5 CUL1 SPOP             | 5.70E-04  |
| GO Function | GO.0051087 | chaperone binding                                     | 3     | AHSA1 DNAJA2 HSPA5                     | 3.60E-03  |
| GO Function | GO.0051879 | Hsp90 protein binding                                 | 2     | AHSA1 CHORDC1                          | 1.10E-02  |
| GO Process  | GO.1903894 | regulation of IRE1-mediated unfolded protein response | 2     | HSPA5 COPS5                            | 1.40E-02  |
| GO Function | GO.0032555 | purine ribonucleotide binding                         | 6     | EIF4A1 GFM2 DNAJA2 UBE2N CHORDC1 HSPA5 | 2.80E-02  |
| GO Function | GO.0000149 | SNARE binding                                         | 2     | STX8 SNAPIN                            | 3.40E-02  |
| GO Process  | GO.0006281 | DNA repair                                            | 4     | WDR48 UBE2N COPS5 PCNA                 | 4.00E-02  |

**Table S3. Cloning primer sequences.**

| <b>Gene/Plasmid</b>       | <b>Primer Sequences (F, forward; R, reverse)</b>                                                                   |
|---------------------------|--------------------------------------------------------------------------------------------------------------------|
| AHSA1 into pENTR-SD-TOPO  | F: 5'-CACCATGGCCAAGTGGGGTGAGG<br>R: 5'-AAATAAGCGTGCGCCATAGC                                                        |
| CNRIP1 into pENTR-SD-TOPO | F: 5'-CACCATGGGGGACCTGCCGGG<br>R: 5'-GAGGAAGGACTCCTTGTTCA                                                          |
| COPS5 into pENTR-SD-TOPO  | F: 5'-CACCATGGCGGCGTCCGGGAG<br>R: 5'-AGAGATGTTAATTTGATTAACAGTT                                                     |
| CUL1 into pENTR-SD-TOPO   | F: 5'-CACCATGTCTCAACCCGGAGCC<br>R: 5'-AGCCAAGTAACTGTAGGTGTC                                                        |
| HSPA5 into pENTR-SD-TOPO  | F: 5'-CACCATGAAGCTCTCCCTGGTGG<br>R: 5'-AGCCAACCTCATCTTTTCTGCTGTA                                                   |
| PCNA into pENTR-SD-TOPO   | F: 5'-CACCATGTTTCGAGGCGCGCTG<br>R: 5'-AGATCCTTCTTCATCCTCGAT                                                        |
| SNAPIN into pENTR-SD-TOPO | F: 5'-CACCATGGCGGGGGCTGGTTCC<br>R: 5'-TTTGCCTGGGGAGCCAGG                                                           |
| STX6 into pENTR-SD-TOPO   | F: 5'-CACCATGTCCATGGAGGACCCCT<br>R: 5'-CAGCACTAAGAAGAGGATGA                                                        |
| STX8 into pENTR-SD-TOPO   | F: 5'-CACCATGGCACCGGACCCCTGG<br>R: 5'-GTTGGTCGGCCAGACTGCA                                                          |
| WDR48 into pENTR-SD-TOPO  | F: 5'-CACCATGGCGGCCCATCACCGG<br>R: 5'-CGTGGACTTCTGACGGTAAT                                                         |
| STX8-HA into pcDNA3.1     | F: 5'-TAAGGATCCCACCATGGCACCGGACCCCTGG<br>R: 5'-TGTGAATTCTAAGCGTAATCTGGAACATCGTATGGGTAGGATCTG<br>TTGGTCGGCCAGACTGCA |
| pEGFPC1-STX6 FL           | F: 5'-GGTGAATTCTATGTCCATGGAGGACCCCT<br>R: 5'-TAAGGATCCTCATCACAGCACTAAGAAGAGG                                       |
| pEGFPC1-STX6 1-234        | F: 5'-GGTGAATTCTATGTCCATGGAGGACCCCT<br>R: 5'-TAAGGATCCCTATTGGCGCCGATCACTGGTC                                       |
| pEGFPC1-STX6 235-255      | F: 5'-GGTGAATTCTTGGTGTGCCATAGCCATCC<br>R: 5'-TAAGGATCCTCATCACAGCACTAAGAAGAGG                                       |
| pEGFPC1-STX6 1-160        | F: 5'-GGTGAATTCTATGTCCATGGAGGACCCCT<br>R: 5'-TAAGGATCCTCATGCCTGCTGCTCCTCAATG                                       |
| pEGFPC1-STX6 161-255      | F: 5'-GGTGAATTCTCAGCAGCAGTTGATCGTGG<br>R: 5'-TAAGGATCCTCATGCCTGCTGCTCCTCAATG                                       |
| pEGFPC1-STX6 1-71         | F: 5'-GGTGAATTCTATGTCCATGGAGGACCCCT<br>R: 5'-TAAGGATCCTCAAATATGCTGATGGTTTCATC                                      |
| pEGFPC1-STX6 72-255       | F: 5'-GGTGAATTCTGAAGCAAATCCTAGAAAATTT<br>R: 5'-TAAGGATCCTCATCACAGCACTAAGAAGAGG                                     |

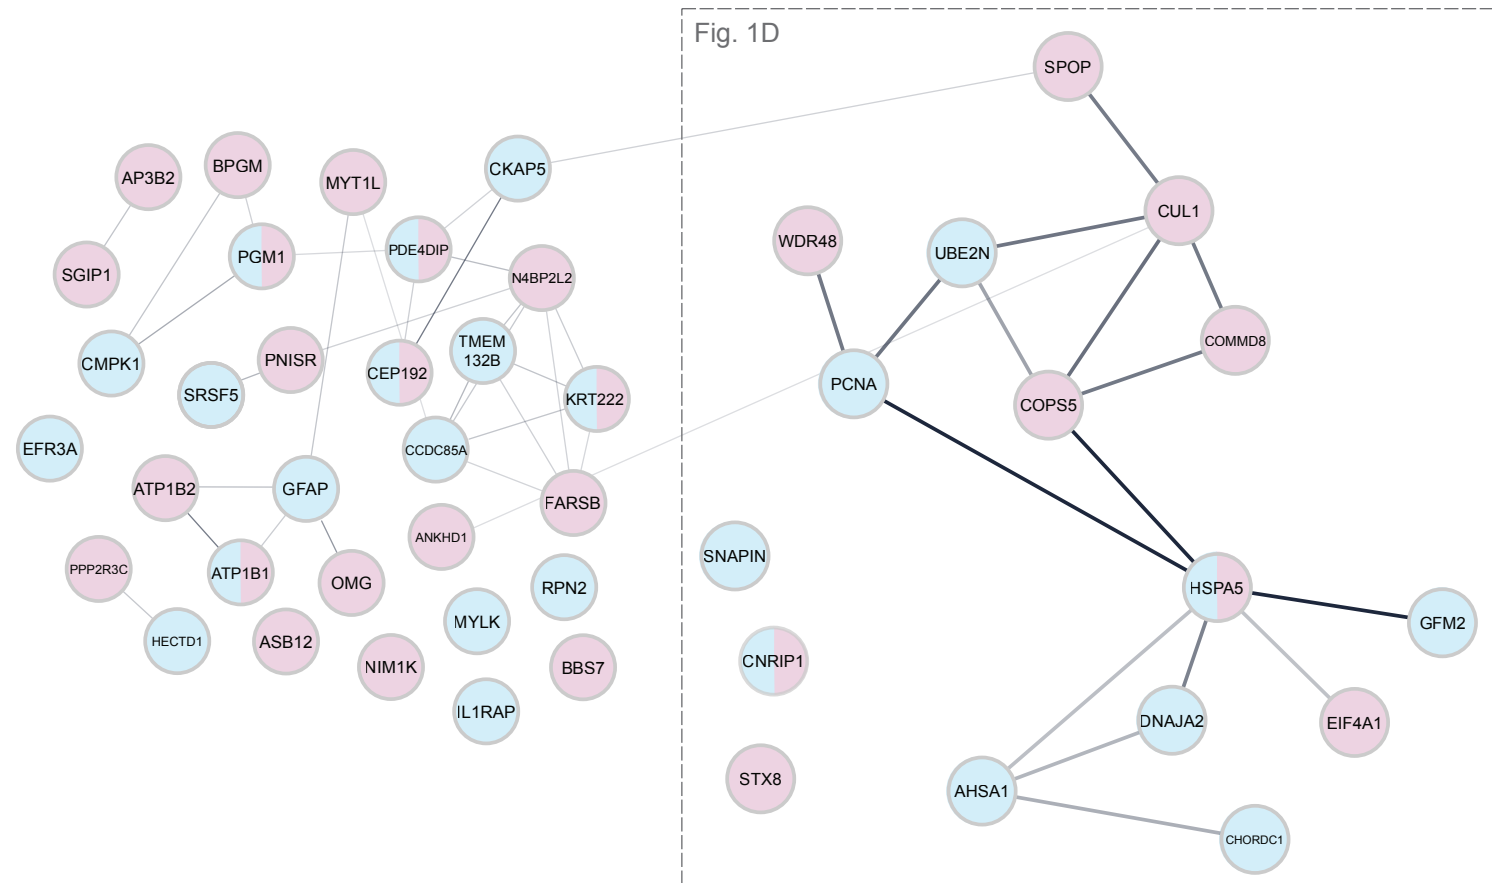

**Fig. S1. Complete STRING networks of CTTR and PM-CTTR interaction candidates.** Ubiquitin-proteasome and molecular chaperons clusters and in individual candidate presented in Fig. 1D are highlighted (broken box).

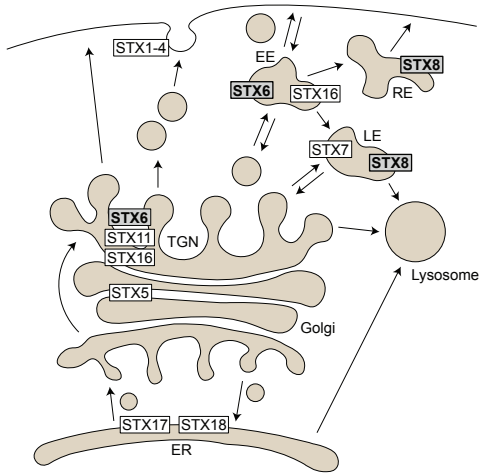

**Fig. S2. Schematic of secretory pathways and syntaxins.** Illustration of the distinct localizations of individual syntaxins (STX) within the secretory machinery of cells. ER, endoplasmic reticulum; TGN, trans-Golgi network; EE, early endosome; LE, late endosome; RE, recycling endosome.

|       |                                          |             |
|-------|------------------------------------------|-------------|
| STX8  | ----MIMV <b>ILLLLVAIVVVAV</b> -----      | [aa216-232] |
| STX6  | -----WCA <b>IAILFAVLLVVLILFLVL</b> ----  | [aa235-255] |
| STX10 | -----WCA <b>IAVLVGVLLLVLILLFSL</b> ----  | [aa229-249] |
| STX16 | -----MLV <b>ILILFVIIIIVLIVVLVGV</b> ---- | [aa302-322] |
| STX7  | -----C <b>IIILILVIGVAIISLIIWGL</b> ----  | [aa239-259] |
| STX5  | WLMVK <b>IFLILIVFFIIFVVFL</b> -----      | [aa334-354] |
| STX4  | ----- <b>IAICVSITVLLAVIIGV</b> TVV-      | [aa276-296] |
| STX3  | ----L <b>IIIIVLVVLLGILALIIGL</b> -----   | [aa264-284] |
| STX2  | -----W <b>IIIAVSVLVVAIIALII</b> GLSVGK-  | [aa265-288] |
| STX1A | ----- <b>IMIIICCVILGIVIASTVGGI</b> ---   | [aa266-286] |
| STX1B | ----- <b>IMIIICCVVLGVVLASSIGGTLGL</b>    | [aa265-288] |
| STX18 | --AGFR <b>VWILFFLVMCSFSLFL</b> -----     | [aa310-330] |
| STX17 | ---LAALP <b>VAGALIGGMVGGPIGL</b> -----   | [aa255-275] |
| STX17 | ----- <b>VAGIAAALGGGVLGFTGGKLI</b> ----  | [aa255-275] |
| STX12 | ---KMC <b>ILVLVLSVIIILILGLII</b> -----   | [aa249-269] |

**Fig. S3. Alignment of transmembrane domain amino acid sequences of syntaxins.** CLUSTAL O alignment of transmembrane (TM) domain amino acid (aa) sequences of human syntaxins. Isoforms are indicated, followed by aa sequences and position of the TM in the respective full-length protein in brackets. Bolt lettering indicates Isoleucine (I), Leucine (L) and Valine (V) residues in similar positions. Conserved positions are highlighted in grey.
